# Supplementary material
Source: ML conference proceedings conference paper supplement (https://openaccess.thecvf.com/content/CVPR2026/html/Zhang_Semantic-Adaptive_Diffusion_for_CVPR_2026_paper.html)
Supplement: Supplementary file 1 [file Zhang_Semantic-Adaptive_Diffusion_for_CVPR_2026_supplemental.pdf]

# Semantic-Adaptive Diffusion for Dynamic Spatiotemporal Fusion

## Supplementary Material

### A. Overview of SA-STF

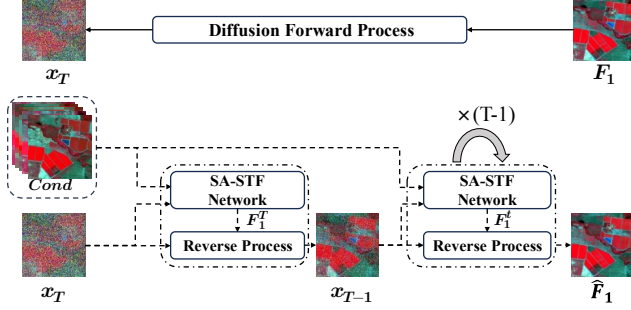

Figure 1. Overview of SA-STF

In SA-STF, the residual  $x_{\text{res}}$  and random noise are progressively injected into the fine-resolution image  $F_1$  during the forward process, which causes the image to gradually degrade as the time step  $t$  increases. When  $t = T$ , the fine-resolution image is degraded into a coarse image  $x_T$ , which is a linear combination of residual and noise. During this process, the SA-STF Network is trained to learn the intermediate variable  $F_1^t$  at each diffusion step. During the reverse process from  $x_t$  to  $x_{t-1}$ , the network takes the degraded image  $x_t$  and the conditional inputs  $\{C_1, F_0, C_0, F_2, C_2\}$  to predict the intermediate variable  $F_1^t$  for reconstruction. The predicted  $F_1^t$  is then substituted into the reverse diffusion step to generate  $x_{t-1}$ . By iterating this reverse step  $T$  times, the model gradually refines  $x_T$  and ultimately achieves the target image  $\hat{F}_1$ .

### B. Reverse Process

The original RDDM [17] reverse process is defined as:

$$x_{t-1} = x_t - (\bar{\alpha}_t - \bar{\alpha}_{t-1}) x_{\text{res}}^\theta - (\bar{\beta}_t - \bar{\beta}_{t-1}) \varepsilon_\theta, \quad (1)$$

where  $x_{\text{res}}^\theta$  and  $\varepsilon_\theta$  denote the residual and noise, respectively, which are typically predicted by two independent networks. Although noise prediction can enhance the diversity of generated results, it may introduce instability during training. By analyzing the forward diffusion process, we observe that both the residual and noise can be expressed in terms of  $F_1$ . Based on this observation, we construct a neural network to reconstruct the intermediate variable  $F_1^t$  (corresponding to  $F_1$ , when  $t = 0$ ) from the degraded image  $x_t$  at each diffusion step  $t$ . Next, we explain the rationale for introducing  $F_1^t$  to formulate the reverse reconstruction process from the perspective of the forward diffusion. The forward diffusion process at time  $t$  is defined as:

$$x_t = F_1^t + \bar{\alpha}_t x_{\text{res}} + \bar{\beta}_t \varepsilon, \quad (2)$$

where  $C_1$  denotes the low-resolution image at the prediction time,  $x_{\text{res}}$  is the residual, and  $\varepsilon$  represents noise. According to the definition of the residual and Eq. 2, the residual and noise can be expressed as:

$$\begin{aligned} x_{\text{res}} &= C_1 - F_1^t, \\ \varepsilon &= \frac{1}{\bar{\beta}_t} (x_t - F_1^t - \bar{\alpha}_t (C_1 - F_1^t)). \end{aligned} \quad (3)$$

Substituting Eq. 3 into Eq. 1,  $x_{t-1}$  can be expressed solely in terms of  $x_t$ ,  $F_1^t$ , and  $C_1$ :

$$\begin{aligned} x_{t-1} &= \frac{\bar{\beta}_{t-1}}{\bar{\beta}_t} x_t + \gamma_t F_1^t - \lambda_t (C_1 - F_1^t), \\ \gamma_t &= 1 - \frac{\bar{\beta}_{t-1}}{\bar{\beta}_t}, \\ \lambda_t &= \bar{\alpha}_{t-1} - \frac{\bar{\beta}_{t-1}}{\bar{\beta}_t} \bar{\alpha}_t. \end{aligned} \quad (4)$$

The above derivation clearly demonstrates that, in the reverse diffusion process, the residual and noise components can be jointly modeled via the intermediate image  $F_1^t$ , thereby providing a theoretical foundation for using a single network to perform reverse reconstruction.

### C. Performance Analysis under Dynamic Changes

To evaluate the performance of the methods under dynamic changes, Fig. 2 visualizes the boxplots of RMSE, SAM, and SSIM computed over the changed regions of the three test sets. SA-STF exhibits the narrowest box widths and the most favorable median values, indicating its superior overall performance. The RMSE and SSIM boxplots indicate that SA-STF is able to accurately reconstruct high-frequency textures in areas with substantial semantic or phenological changes. Moreover, SA-STF's superior SAM scores further confirm its ability to preserve spectral consistency and prevent spectral distortion in change regions.

### D. Dataset

The CIA dataset was collected in southern New South Wales, Australia (34.0034°E, 145.0675°S), a representative irrigated agricultural region dominated by rice cultivation. The LGC dataset was collected in northern New South Wales, Australia (149.2815°E, 29.0855°S), capturing the complete sequence of flooding events and the subsequent vegetation recovery. The AHB dataset was collected

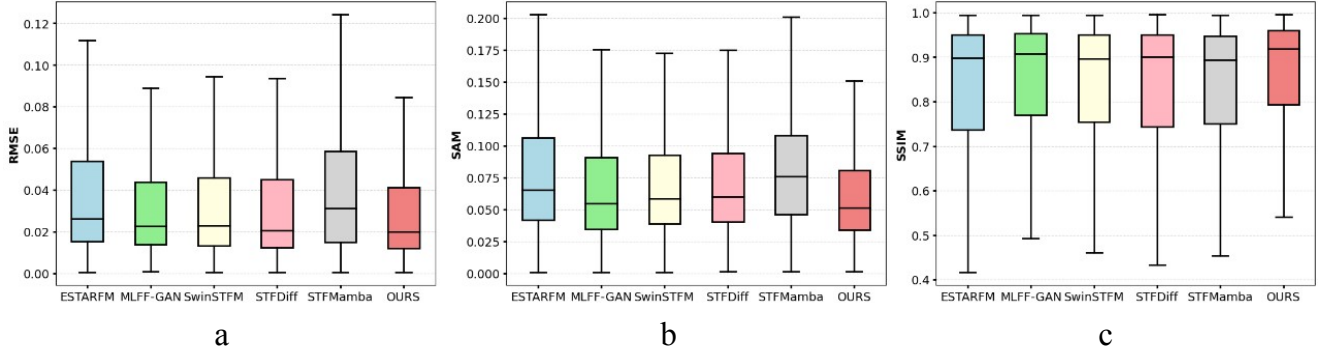

Figure 2. Performance analysis under dynamic changes. a. RMSE Boxplot; b. SAM Boxplot; c. SSIM Boxplot;

from Ar Horqin Banner, Inner Mongolia Autonomous Region, China (43.3619°N, 119.0375°E), a typical rural landscape characterized by mixed farming and pastoral activities. The region exhibits notable spatial heterogeneity, with diverse land cover types such as cropland, grassland, forest, and bare soil, as well as distinct seasonal phenological dynamics. In all three datasets, each image was divided into patches of size  $256 \times 256$ . Specifically, the CIA dataset contains 1,287 training patches and 117 testing patches; the LGC dataset includes 2,527 training patches and 361 testing patches; and the AHB dataset comprises 2,907 training patches and 327 testing patches. The dataset splits are summarized in Table 3.

## E. Network Parameters

Table 2 describes the network architecture used in our framework. It lists each module, including the Noise Encoder, Shallow Fusion, Deep Fusion, De-Res Block and Denoising Decoder, along with their corresponding block names, convolution kernel sizes, input and output channels, and feature map sizes at each stage.

## F. Classify results

The goal of STF is to generate high-quality time-series imagery for downstream tasks like land cover classification and agricultural assessment. We evaluate fusion quality by performing K-means [5] classification on both ground truth and fused images across the three datasets, using OA, Precision, Recall, and F1 Score metrics [22]. The classification results and quantitative evaluations on the CIA, LGC, and AHB datasets are shown in Fig. 3, Fig. 4, Fig. 5 and Table 1. Traditional and deep learning-based approaches often exhibit limited generalization across diverse datasets. In contrast, SA-STF consistently achieves the best performance across all evaluation metrics, highlighting its strong generalization capability to downstream tasks. This performance gain is attributed to the temporal feature alignment and semantic-adaptive fusion modules, which explicitly model land cover dynamics and adaptively transfer high-frequency

Table 1. Quantitative evaluations of classification performance

| Dataset | Method        | OA $\uparrow$ | Precision $\uparrow$ | Recall $\uparrow$ | F1 $\uparrow$ |
|---------|---------------|---------------|----------------------|-------------------|---------------|
| CIA     | ESTARFM [41]  | 0.6729        | 0.6415               | 0.6449            | 0.6421        |
|         | MLFF-GAN [27] | 0.5727        | 0.5736               | 0.5717            | 0.5715        |
|         | SwinSTFM [1]  | 0.5745        | 0.5404               | 0.5420            | 0.5381        |
|         | STFDiff [10]  | 0.6585        | 0.6353               | 0.6363            | 0.6342        |
|         | STFMamba [38] | 0.4968        | 0.4786               | 0.4752            | 0.4743        |
|         | OURS          | <b>0.7121</b> | <b>0.6862</b>        | <b>0.6866</b>     | <b>0.6862</b> |
| LGC     | ESTARFM[41]   | 0.6091        | 0.6149               | 0.6429            | 0.6171        |
|         | MLFF-GAN[27]  | 0.6129        | 0.6141               | 0.6597            | 0.6322        |
|         | SwinSTFM[1]   | 0.6040        | 0.6103               | 0.6391            | 0.6227        |
|         | STFDiff[10]   | 0.6319        | 0.6454               | 0.6562            | 0.6504        |
|         | STFMamba[38]  | 0.6403        | 0.6497               | 0.6752            | 0.6608        |
|         | OURS          | <b>0.6561</b> | <b>0.6620</b>        | <b>0.6840</b>     | <b>0.6718</b> |
| AHB     | ESTARFM[41]   | 0.5266        | 0.5152               | 0.5060            | 0.5083        |
|         | MLFF-GAN[27]  | 0.5182        | 0.4959               | 0.4921            | 0.4932        |
|         | SwinSTFM[1]   | 0.5436        | 0.5174               | 0.5168            | 0.5167        |
|         | STFDiff[10]   | 0.5330        | 0.5173               | 0.5116            | 0.5131        |
|         | STFMamba[38]  | 0.5227        | 0.4912               | 0.4931            | 0.4920        |
|         | OURS          | <b>0.5668</b> | <b>0.5498</b>        | <b>0.5440</b>     | <b>0.5459</b> |

information from reference images. Therefore, even under challenging conditions with complex surface changes, SA-STF maintains high spectral fidelity and spatiotemporal consistency.

Table 2. Network Structure

| Module                   |           | Kernel Size | In-channel | Out-channel | Feature Size |
|--------------------------|-----------|-------------|------------|-------------|--------------|
| <b>Noise Encoder</b>     | Block1    | 3×3         | 6          | 64          | 256×256      |
|                          | Block2    | 3×3         | 64         | 64          | 256×256      |
|                          | Block3    | 3×3         | 64         | 128         | 128×128      |
|                          | Block4    | 3×3         | 128        | 256         | 64×64        |
|                          | Block5    | 3×3         | 256        | 512         | 32×32        |
|                          | Block6    | 3×3         | 512        | 512         | 16×16        |
| <b>Shallow Fusion</b>    | Block1    | 3×3         | 6          | 64          | 256×256      |
|                          | Block2    | 3×3         | 64         | 64          | 256×256      |
|                          | Block3    | 3×3         | 64         | 128         | 128×128      |
|                          | Block4    | 3×3         | 128        | 256         | 64×64        |
|                          | Block5    | 3×3         | 256        | 512         | 32×32        |
| <b>Deep Fusion</b>       | TFA1      | 1×1         | 512        | 512         | 16×16        |
|                          | TFA2      | 1×1         | 512        | 512         | 16×16        |
| <b>De-Res Block</b>      | TE-Block1 | 3×3         | 512        | 512         | 16×16        |
|                          | TE-Block  | 3×3         | 512        | 512         | 16×16        |
| <b>Denoising Decoder</b> | Block1    | 3×3         | 1024       | 512         | 16×16        |
|                          | Block2    | 3×3         | 1024       | 512         | 32×32        |
|                          | Block3    | 3×3         | 768        | 256         | 64×64        |
|                          | Block4    | 3×3         | 384        | 128         | 128×128      |
|                          | Block5    | 3×3         | 192        | 64          | 256×256      |
|                          | Block6    | 3×3         | 64         | 6           | 256×256      |

Table 3. Training and testing dataset.

| Dataset  | CIA      |          |          | LGC      |          |          | AHB      |          |          |          |
|----------|----------|----------|----------|----------|----------|----------|----------|----------|----------|----------|
|          | Time1    | Time2    | Time3    | Time1    | Time2    | Time3    | Time1    | Time2    | Time3    |          |
| Training | 20011007 | 20011016 | 20011101 | 20040416 | 20040502 | 20040705 | 20160607 | 20160826 | 20161013 |          |
|          | 20011016 | 20011101 | 20011108 | 20040502 | 20040705 | 20040806 | 20160826 | 20161013 | 20170525 |          |
|          | 20011101 | 20011108 | 20011124 | 20040705 | 20040806 | 20040822 | 20161013 | 20170525 | 20170610 |          |
|          | 20011108 | 20011124 | 20011203 | 20040806 | 20040822 | 20041025 | 20170525 | 20170610 | 20170728 |          |
|          | 20011124 | 20011203 | 20020104 | 20040822 | 20041025 | 20041126 | 20170610 | 20170728 | 20170829 |          |
|          | 20011203 | 20020104 | 20020111 | 20041025 | 20041126 | 20050302 | 20170728 | 20170829 | 20180512 |          |
|          | 20020104 | 20020111 | 20020212 | 20041126 | 20050302 | 20050403 | 20170829 | 20180512 | 20181003 |          |
|          | 20020111 | 20020212 | 20020221 |          |          |          | 20180512 | 20181003 | 20181019 |          |
|          | 20020212 | 20020221 | 20020309 |          |          |          |          |          |          |          |
|          | 20020221 | 20020309 | 20020316 |          |          |          |          |          |          |          |
|          | 20020309 | 20020316 | 20020401 |          |          |          |          |          |          |          |
|          | Testing  | 20020410 | 20020417 | 20020426 | 20041228 | 20050113 | 20050129 | 20150504 | 20150621 | 20150707 |

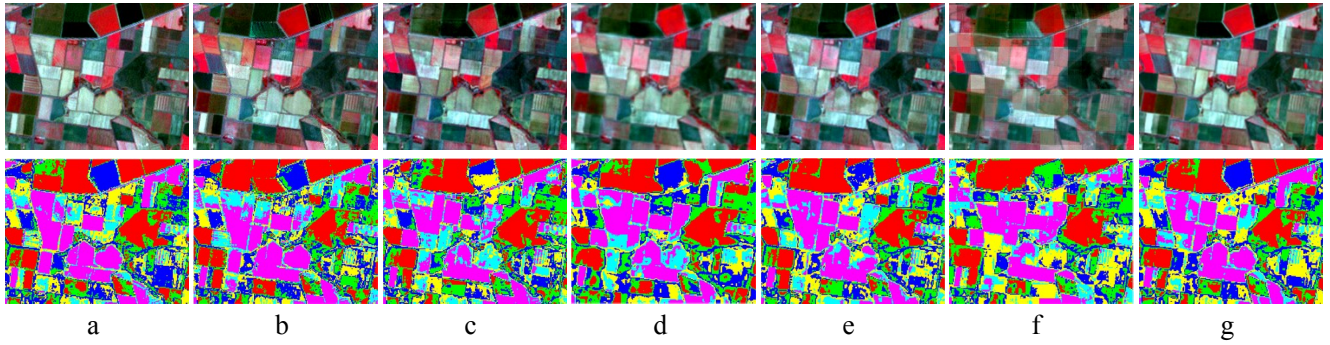

Figure 3. Classification results on the CIA dataset. a. Ground Truth (GT); b. ESTARFM[41]; c. MLFF-GAN[27]; d. SwinSTFM[1]; e. STFDiff[10]; f. STFMamba[38]; g. OURS.

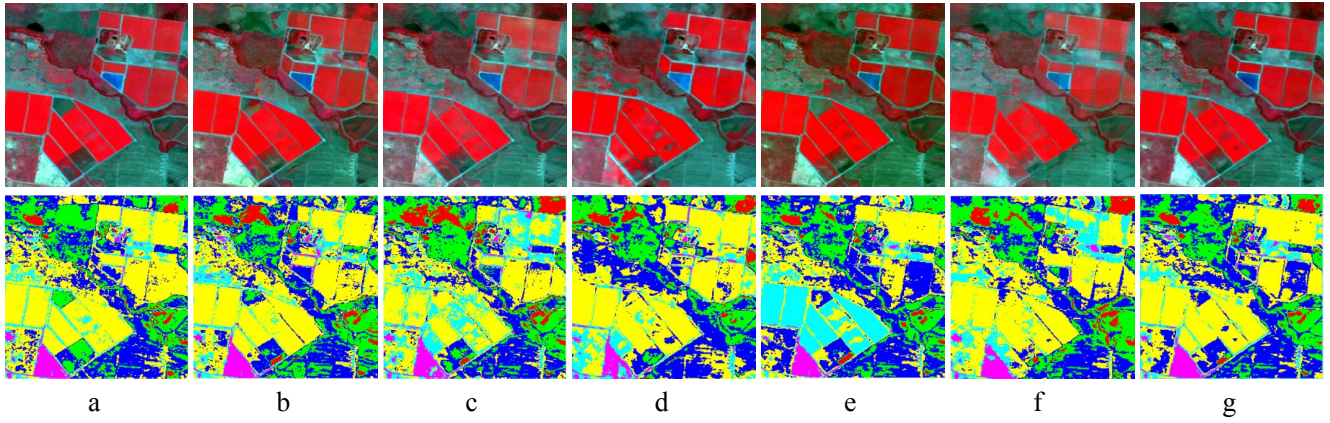

Figure 4. Classification results on the LGC dataset. a. Ground Truth (GT); b. ESTARFM[41]; c. MLFF-GAN[27]; d. SwinSTFM[1]; e. STFDiff[10]; f. STFMamba[38]; g. OURS.

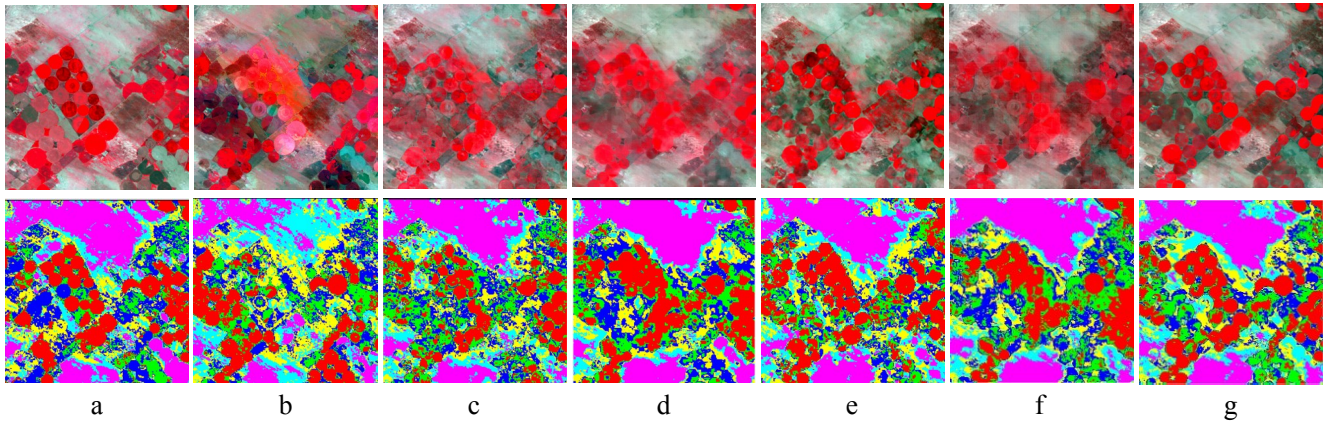

Figure 5. Classification results on the AHB dataset. a. Ground Truth (GT); b. ESTARFM[41]; c. MLFF-GAN[27]; d. SwinSTFM[1]; e. STFDiff[10]; f. STFMamba[38]; g. OURS.
